# Supplementary figures and images for: MonoPhy : a simple R package to find and visualize monophyly issues
Source: PeerJ journal article supplement (doi:10.7717/peerj-cs.56), 2016-03-30

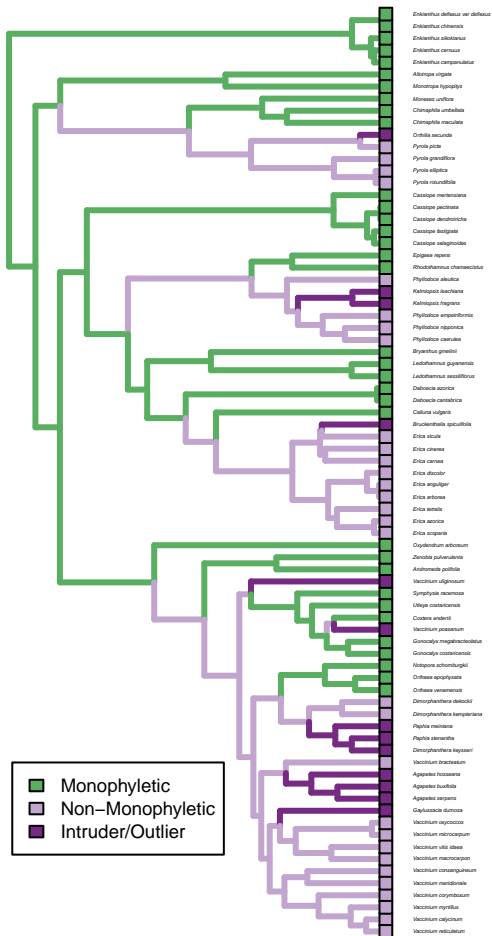

Supplement: MonoPhySuppFig1.pdf [file MonoPhySuppFig1.pdf]
